# Supplementary material
Source: PubMed Central journal article supplement (PMC8370347)
Supplement: Suppl_FigS1.pdf [file Suppl_FigS1.pdf]

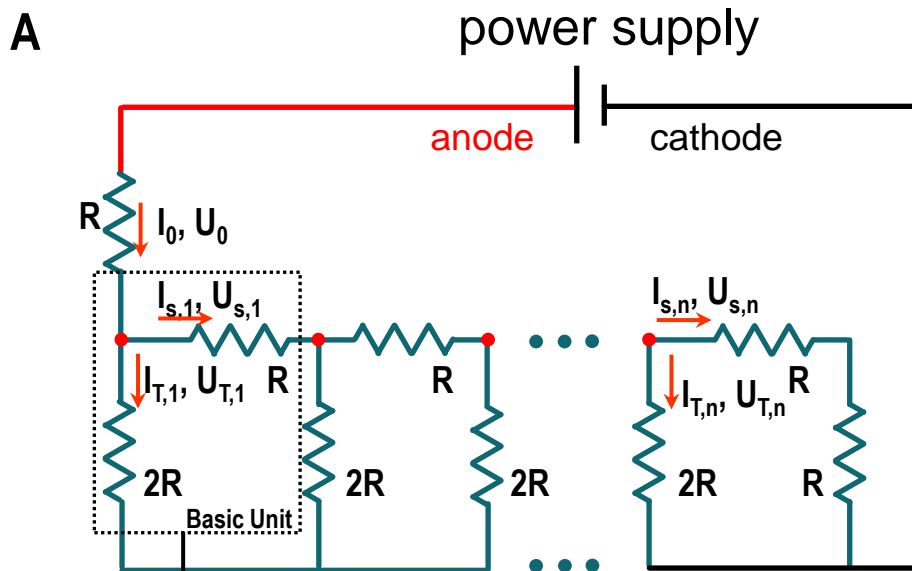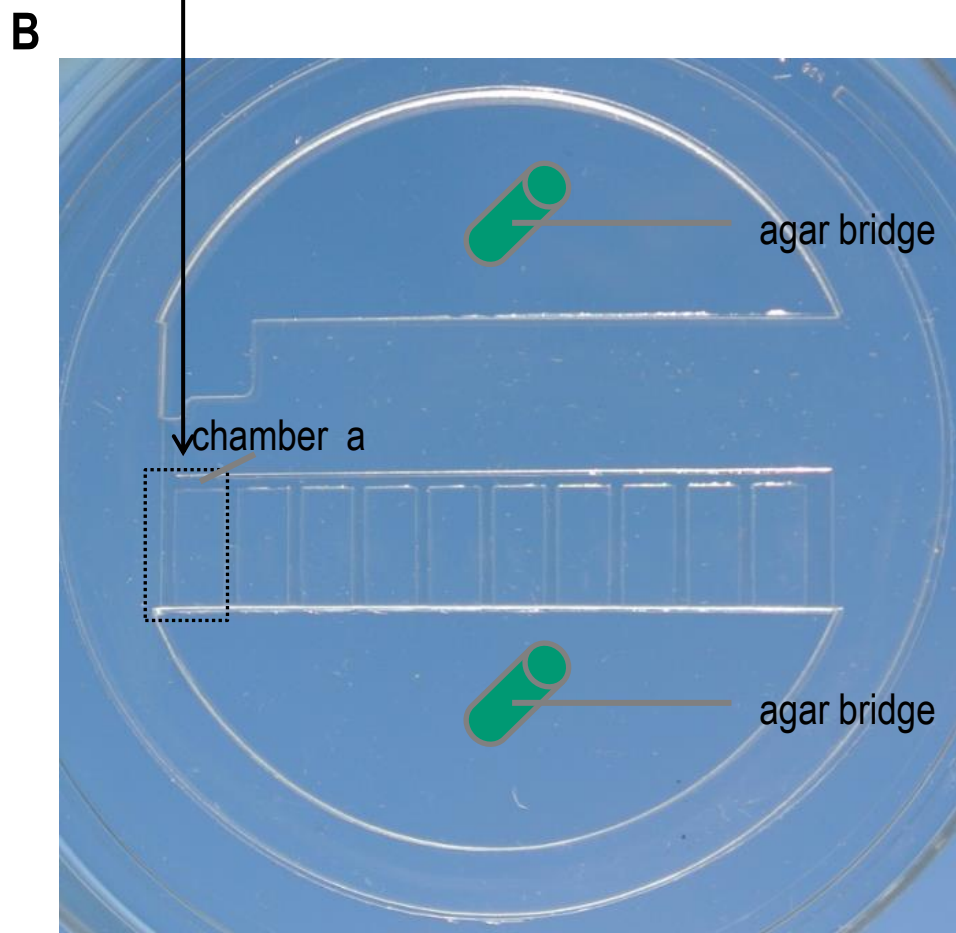

**sFigure 1 (A)** An electrical equivalent circuit model of multi-field chips. **(B)** A top view of the chip using the R-2R resistor ladder network. A basic unit was showed in the box.
