# Supplementary material
Source: PubMed Central journal article supplement (PMC8370347)
Supplement: Suppl_FigS2.pdf [file Suppl_FigS2.pdf]

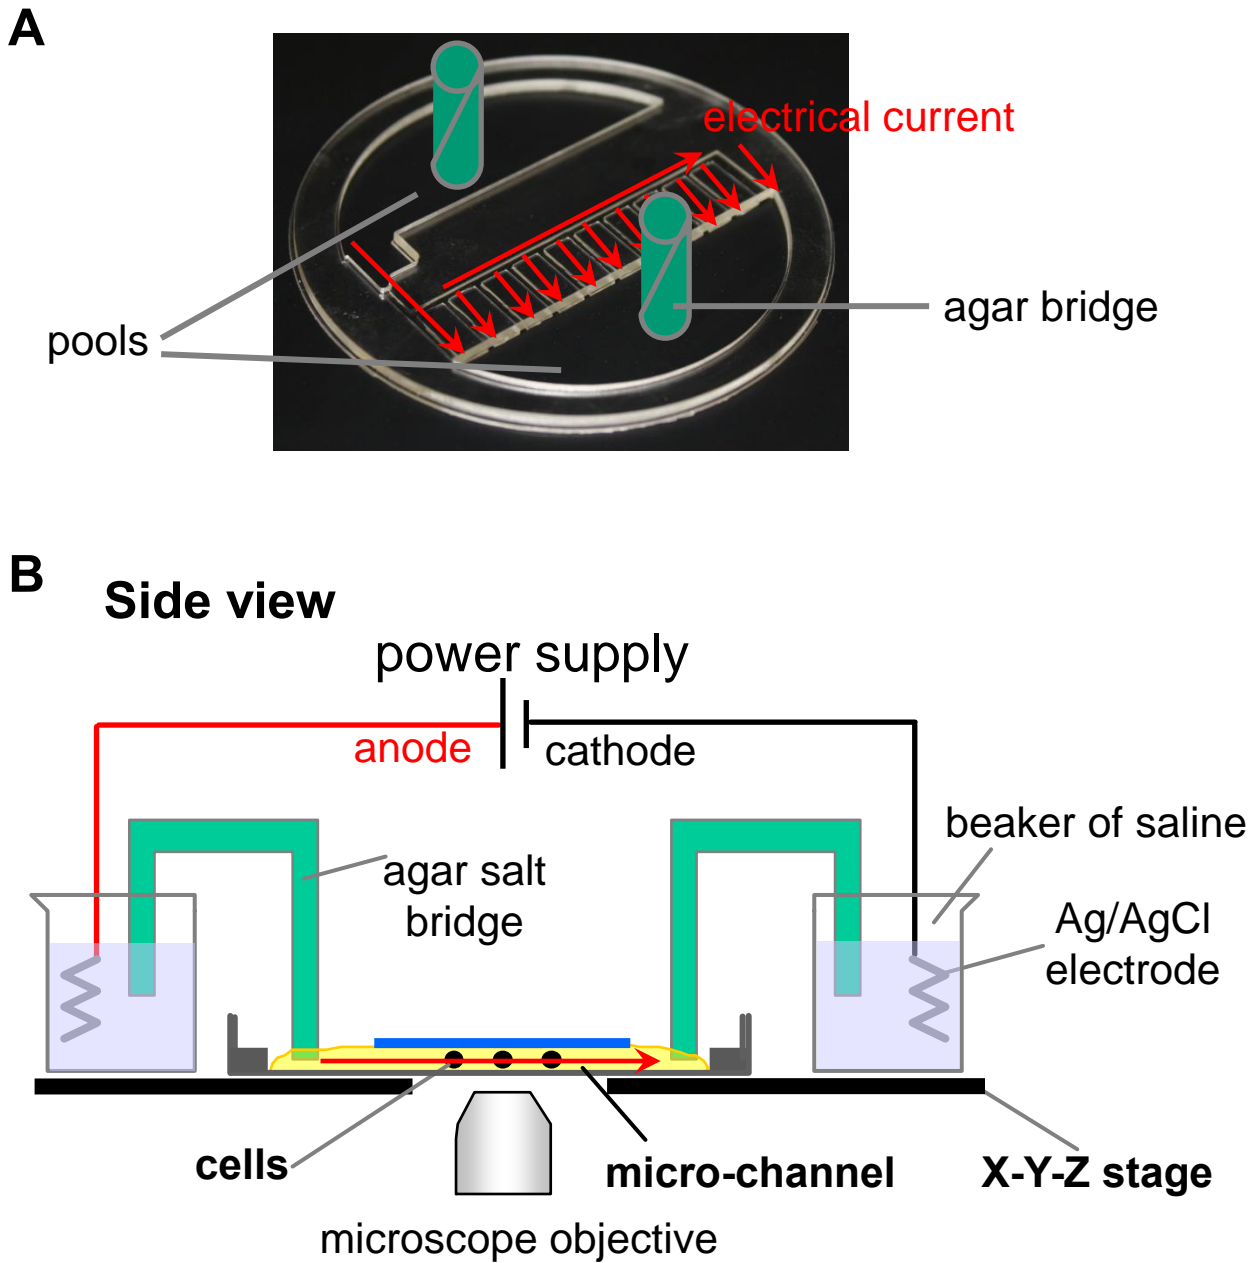

**sFigure 2 Experimental design of multi-field chips and field application. (A)** Chip assembled to connect with power supply via a pair of agar bridges. **(B)** Side-on view of field application set up includes DC power supply and Ag/AgCl electrodes isolated from the chip using agar salt bridges.
