# Supplementary material
Source: PubMed Central journal article supplement (PMC8370347)
Supplement: Suppl_FigS3.pdf [file Suppl_FigS3.pdf]

**A** The electrical resistance of a given material will decrease with increasing height.

**Pouillet's law**

$$R = \rho \frac{\ell}{A}$$

where

$R$  is the electrical resistance of a uniform specimen of the material (measured in ohms,  $\Omega$ );

$\rho$  is the electrical resistivity of a uniform specimen of the material (measured in ohms·meter,  $\Omega \cdot \text{m}$ );

$\ell$  is the length of the piece of material (measured in metres, m);

$A$  is the cross-sectional area of the specimen (measured in square metres,  $\text{m}^2$ ).

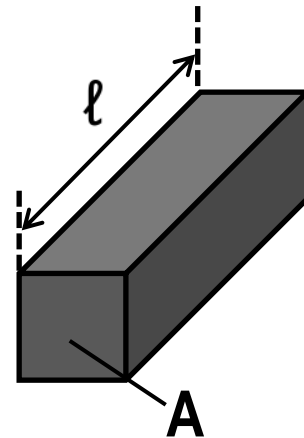

$$A = H \cdot W$$

where

$H$  is the height of chamber;

$W$  is the width of chamber.

**B**

$$I = \left( \frac{V \cdot W}{\rho \cdot \ell} \right) \cdot H$$

$$\alpha = \frac{V \cdot W}{\rho \cdot \ell}$$

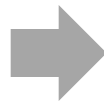

$$I = \alpha H$$

**C**

$$Q = \left( \frac{V^2 \cdot W}{\rho \cdot \ell} \right) \cdot H$$

$$\beta = \frac{V^2 \cdot W}{\rho \cdot \ell}$$

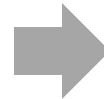

$$Q = \beta H$$

**sFigure 3 Both electric currents and Joule heating will increase proportionally with thickness of chamber/tissue. (A)** By Pouillet's law, the electrical resistance of a given material will decrease with increasing the height. Therefore, **(B)** electric currents will increase proportionally with thickness of chamber/tissue, and **(C)** Joule heating will increase proportionally with thickness of chamber/tissue.
