# Supplementary material
Source: PubMed Central journal article supplement (PMC8370347)
Supplement: Suppl_FigS4.pdf [file Suppl_FigS4.pdf]

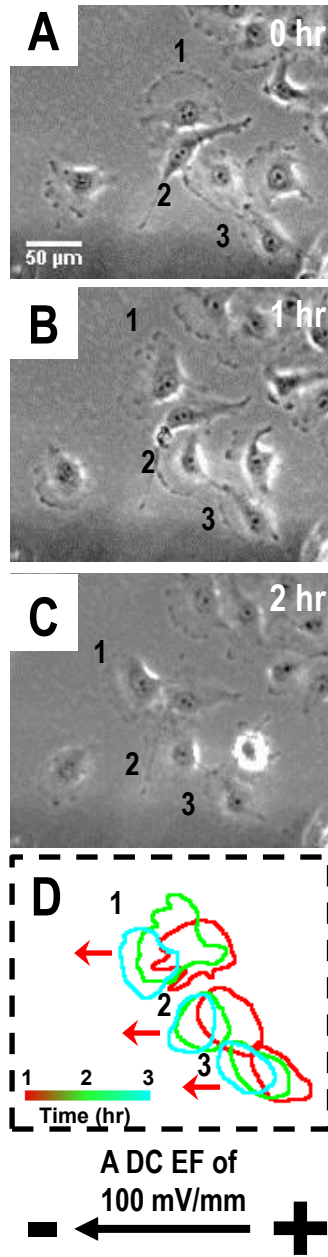

**sFigure 4 Cathodal migration of endothelial cells in DC EFs. (A-C)** Time lapse photographs of cell migration in a DC EF of 100 mV/mm for 2 hrs. **(D)** Outlines of the labeled cells from 0 to 2 hr highlight cell migration. Arrows show direction of the cells migrated.
