# Supplementary material
Source: PubMed Central journal article supplement (PMC8370347)
Supplement: Suppl_FigS6.pdf [file Suppl_FigS6.pdf]

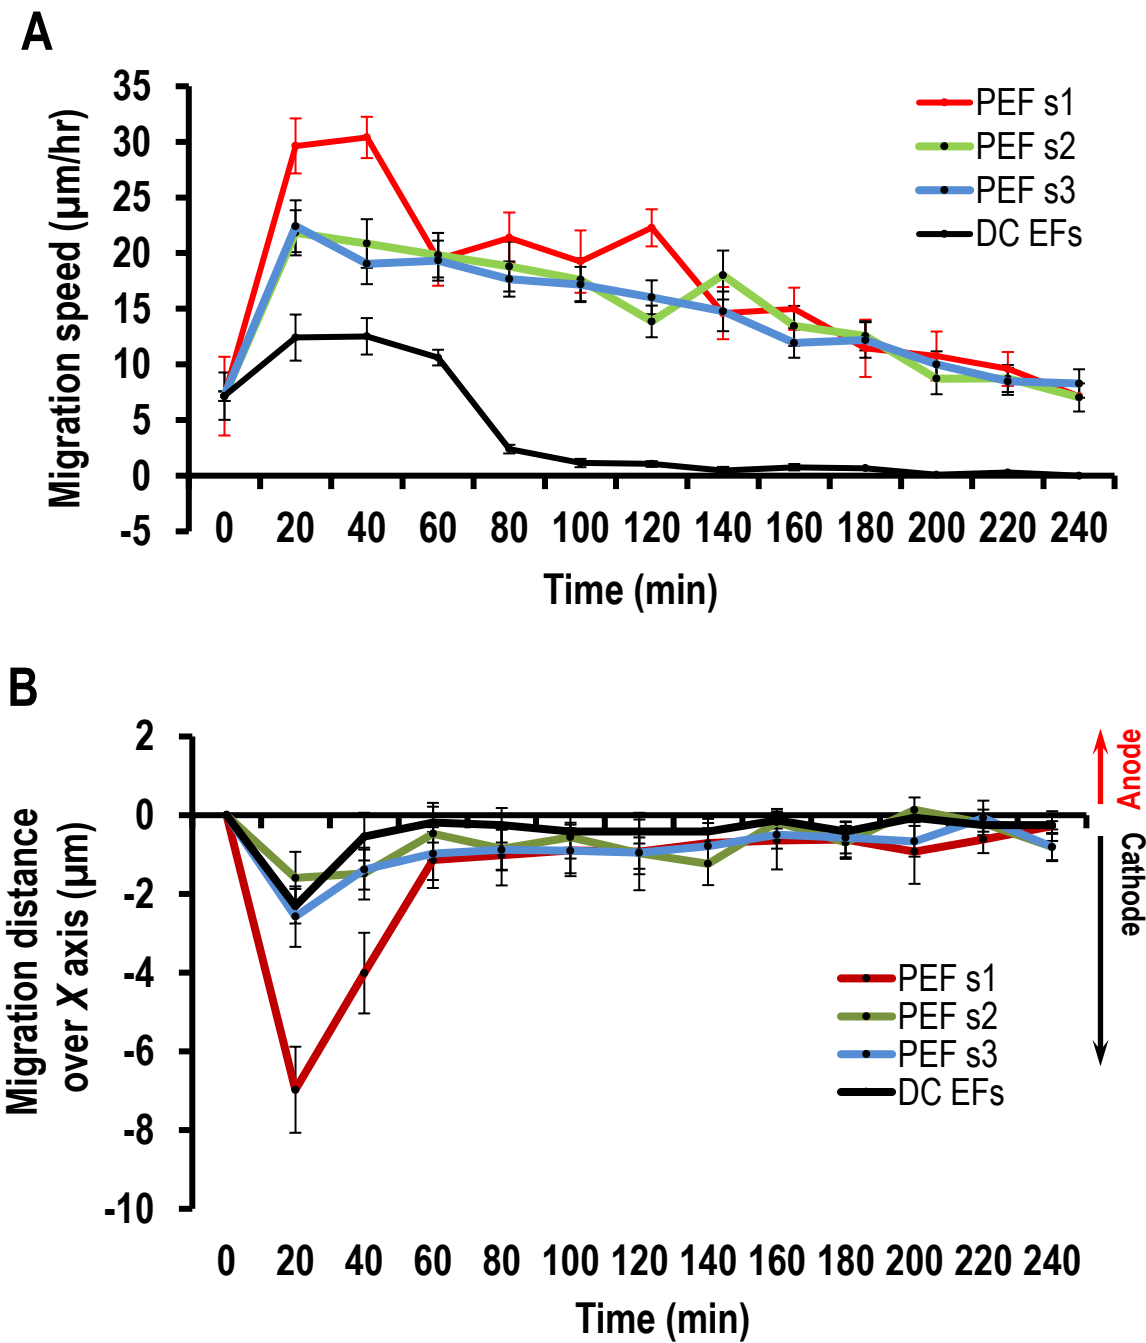

**sFigure 6 (A)** Breakdown of cell migration speed for 4 hrs with an EF of 400 mV/mm. **(B)** Break down of cell migration distance over X axis for 4 hrs with an EF of 400 mV/mm.
