# Supplementary material
Source: PubMed Central journal article supplement (PMC8370347)
Supplement: Suppl_FigS7.pdf [file Suppl_FigS7.pdf]

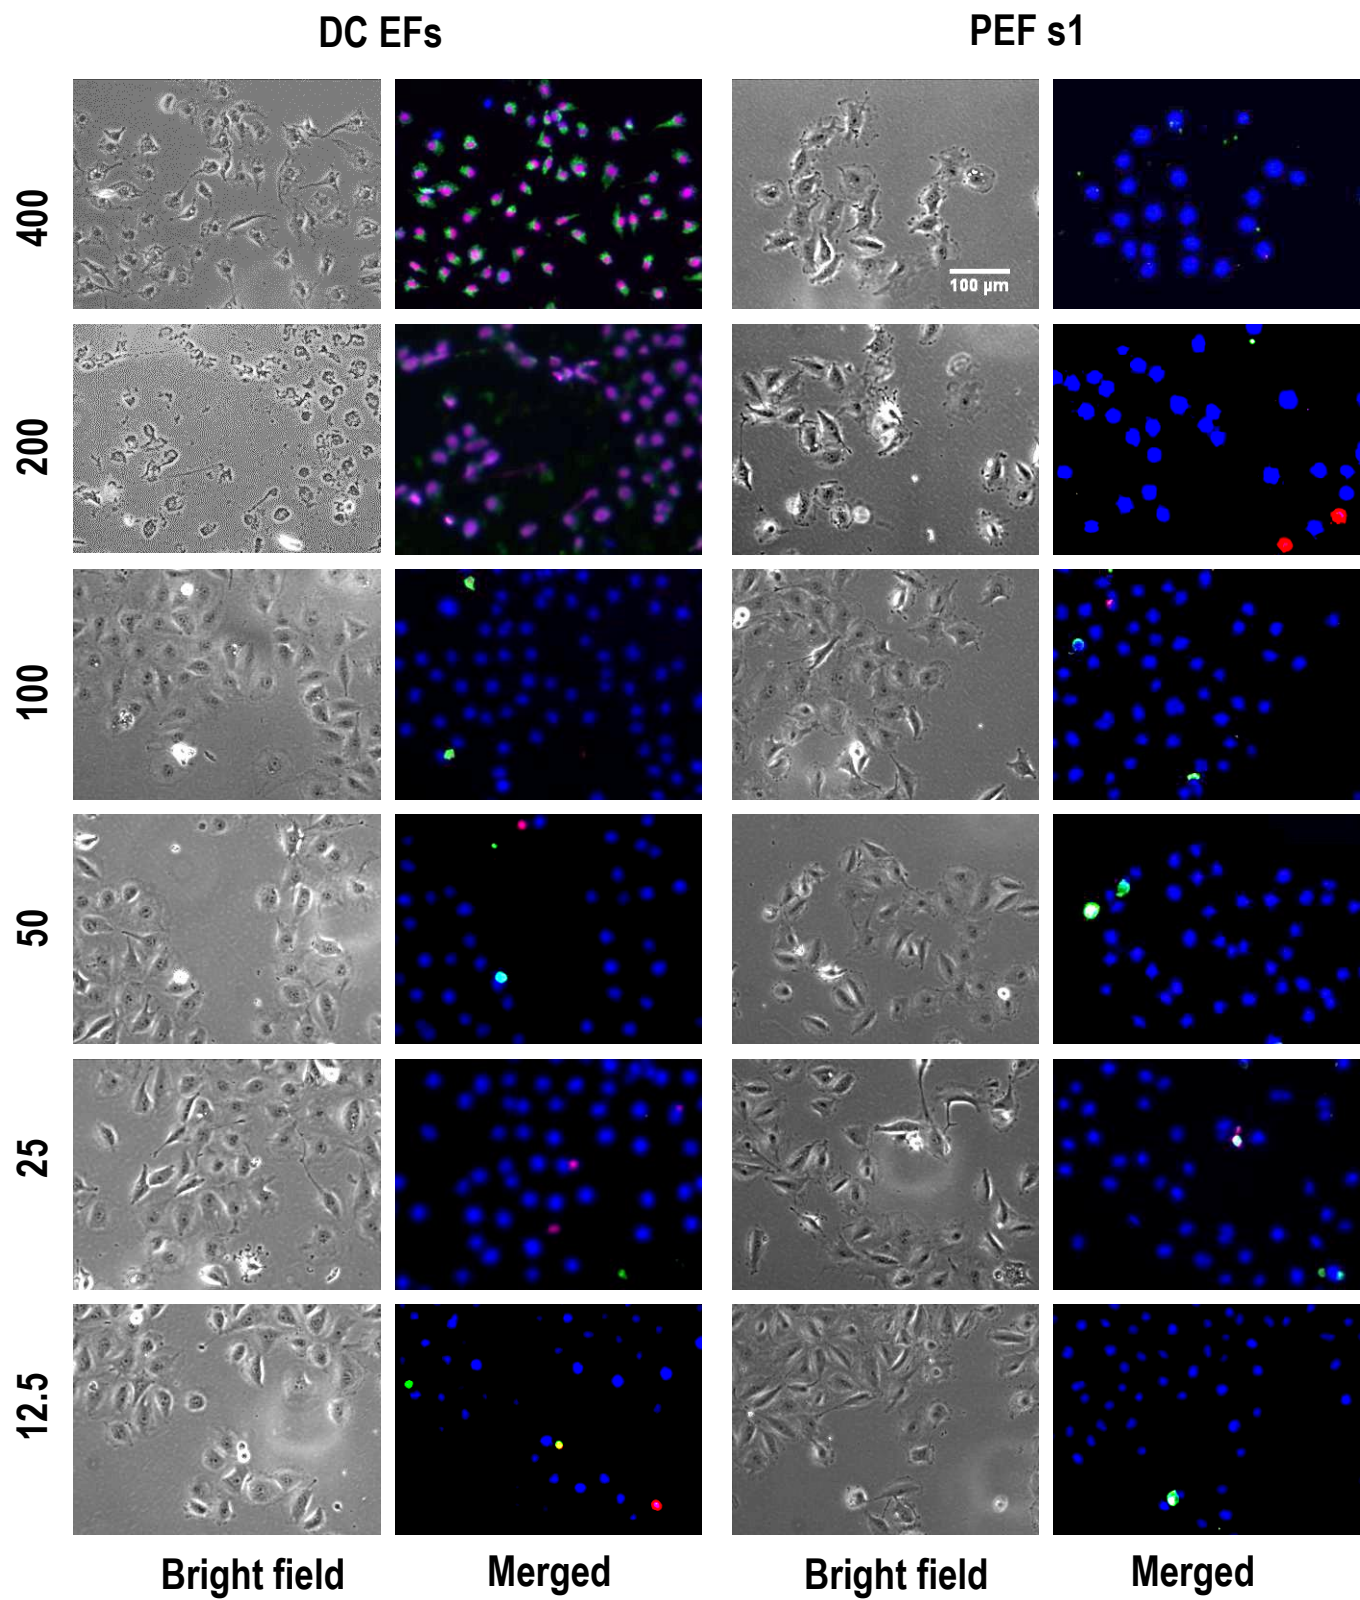

**sFigure 7** Assessment of cell apoptosis and necrosis. Green, apoptotic cells; red, necrotic cells; blue, nucleus.
