# Supplementary material
Source: PubMed Central journal article supplement (PMC8370347)
Supplement: Suppl_TableS1-S2.pdf [file Suppl_TableS1-S2.pdf]

sTable 1 Cell numbers of Figure 4A, B

| Voltage (mV/mm) |                       | 0  | 6.25 | 12.5 | 25 | 50 | 100 | 200 | 400 |
|-----------------|-----------------------|----|------|------|----|----|-----|-----|-----|
| Cell numbers    | Thin chamber (0.4 mm) | 66 | 52   | 53   | 80 | 52 | 75  | 91  | 90  |
|                 | Thick chamber (1 mm)  | 59 | 48   | 68   | 64 | 64 | 61  | 50  | 46  |

sTabel 2 Cell numbers of Figure 4C, D

| Voltage (mV/mm) |                       | 0   | 6.25 | 12.5 | 25  | 50  | 100 | 200 | 400 |
|-----------------|-----------------------|-----|------|------|-----|-----|-----|-----|-----|
| Cell numbers    | Thin chamber (0.4 mm) | 256 | 230  | 443  | 236 | 380 | 460 | 386 | 250 |
|                 | Thick chamber (1 mm)  | 260 | 208  | 211  | 230 | 334 | 302 | 261 | 120 |
