# Supplementary material
Source: PubMed Central journal article supplement (PMC8370347)
Supplement: Suppl_TableS3.pdf [file Suppl_TableS3.pdf]

sTable 3 Cell numbers of Figure 5F

| <b>Voltage (mV/mm)</b> | <b>0</b> | <b>6.25</b> | <b>12.5</b> | <b>25</b> | <b>50</b> | <b>100</b> | <b>200</b> | <b>400</b> |
|------------------------|----------|-------------|-------------|-----------|-----------|------------|------------|------------|
| PEF S1                 | 61       | 48          | 55          | 57        | 51        | 86         | 61         | 66         |
| PEF S2                 | 72       | 66          | 54          | 70        | 57        | 71         | 71         | 70         |
| PEF S3                 | 59       | 59          | 52          | 54        | 77        | 76         | 66         | 69         |
| DC EFs                 | 59       | 48          | 68          | 64        | 64        | 61         | 50         | 46         |
