# Supplementary material
Source: PubMed Central journal article supplement (PMC8370347)
Supplement: Suppl_TableS4.pdf [file Suppl_TableS4.pdf]

sTable 4 Cell numbers of Figure 6B, C

| <b>Voltage (mV/mm)</b> | <b>0</b> | <b>6.25</b> | <b>12.5</b> | <b>25</b> | <b>50</b> | <b>100</b> | <b>200</b> | <b>400</b> |
|------------------------|----------|-------------|-------------|-----------|-----------|------------|------------|------------|
| PEF S1                 | 256      | 189         | 208         | 174       | 235       | 280        | 146        | 107        |
| PEF S2                 | 256      | 196         | 321         | 221       | 270       | 206        | 205        | 184        |
| PEF S3                 | 256      | 193         | 230         | 320       | 429       | 438        | 232        | 181        |
| DC EFs                 | 260      | 208         | 211         | 230       | 334       | 302        | 261        | 120        |
