# Supplementary material
Source: PubMed Central journal article supplement (PMC8370347)

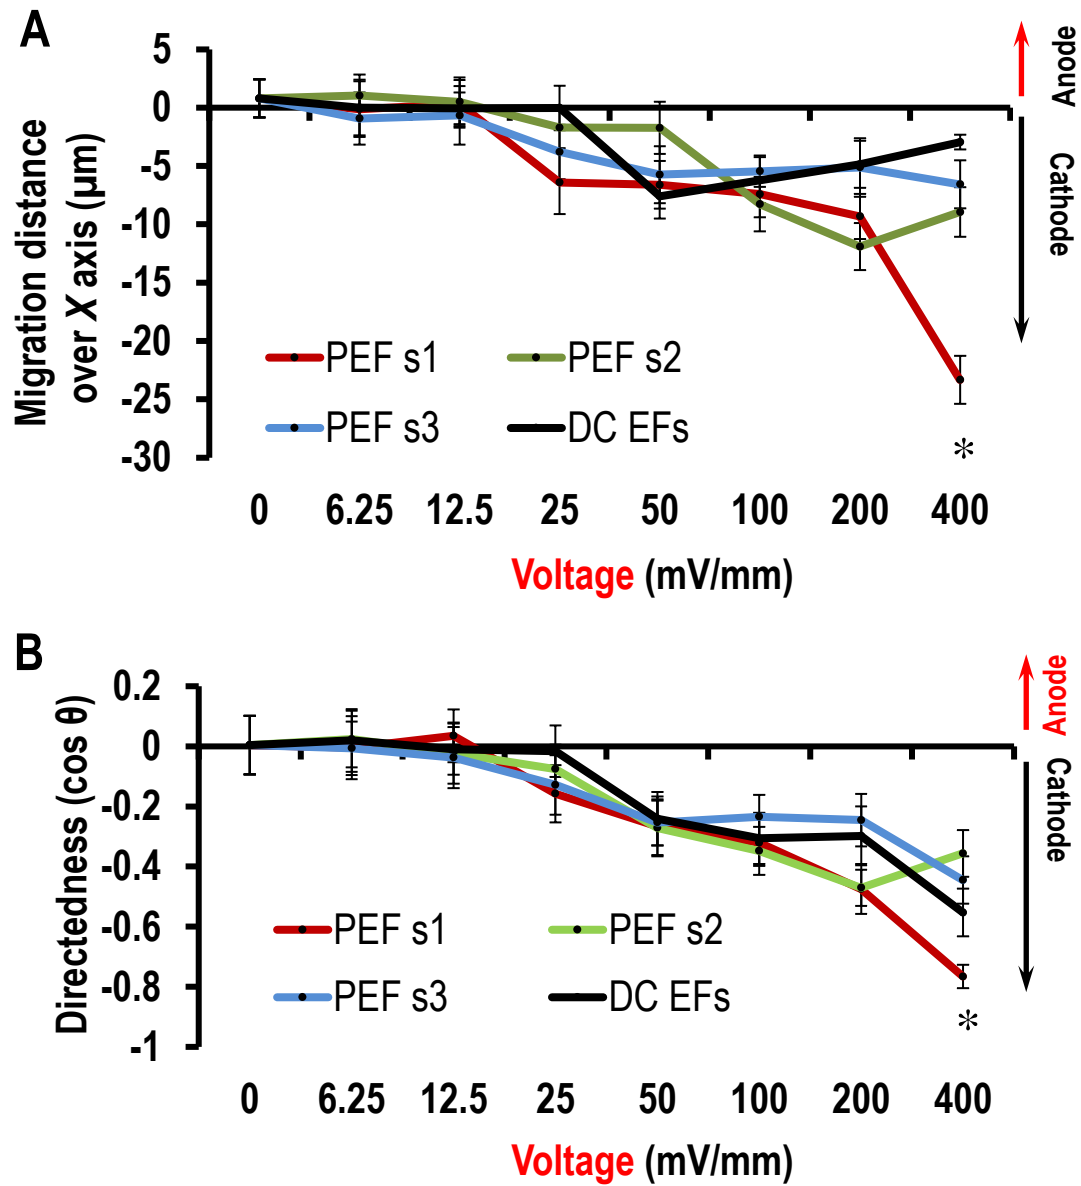

**sFigure 5 (A)** Cell migration distance over X axis. **(B)** Cell migration directedness.

Supplement: Suppl_FigS5.pdf [file Suppl_FigS5.pdf]
